# Supplementary material for: The study of the pathogenesis of idiopathic central precocious puberty based on gut microbiota
Source: Research Square preprint supplement (doi:10.21203/rs.3.rs-716354/v2), 2021-09-02
Supplement: Supplementary file 1 [file 7c775ecd3fbf3f4bbd2c1435.xlsx]

## Sheet: Supplementary Table 2
	Bacteroides	Faecalibacterium	Roseburia	Prevotella	Blautia	Lachnospiracea_incertae_sedis	Ruminococcus	Parabacteroides	Bifidobacterium	Alistipes	Ruminococcus2	Fusicatenibacter	Clostridium_sensu_stricto	Escherichia.Shigella	Clostridium_XVIII	Megamonas	Parasutterella	Anaerostipes	Clostridium_XlVa	Gemmiger	Klebsiella	Collinsella	Oscillibacter	Romboutsia	Dialister	Dorea	Haemophilus	Clostridium_IV	Coprococcus	Megasphaera	Phascolarctobacterium	Flavonifractor	Streptococcus	Butyricicoccus	Bilophila	Sutterella	Clostridium_XlVb	Fusobacterium	Rhizobium	Alloprevotella	Odoribacter	Butyricimonas	Barnesiella	Desulfovibrio	Bradyrhizobium	Sporobacter	Veillonella	Akkermansia	Lactobacillus
E2	-0.276068	0.330729	0.255494	-0.344548	0.223557	0.30217	0.0362359	-0.102566	0.0239525	-0.140644	-0.0657159	-0.0985739	0.133274	0.222021	0.0635663	0.128054	0.238297	-0.00552751	0.0798418	0.0528184	-0.0847551	0.0644876	0.424083	0.130818	0.10318	0.240139	-0.0488263	-0.156306	0.155998	-0.116385	0.367272	0.0635663	0.0132046	0.212809	-0.268698	0.435445	-0.0503617	-0.0224205	0.525162	0.112982	-0.0128975	-0.324587	-0.0758497	0.303599	0.521245	-0.0638734	-0.0356217	0.114919	-0.0773851
FSH	-0.30835	-0.036025	0.461914	-0.446649	0.297054	0.272935	-0.124256	-0.129751	0.0134331	-0.353229	0.0314456	-0.0747977	0.394444	0.233857	0.299191	0.105938	0.105327	0.168219	0.242711	0.160281	0.133109	0.094642	0.311708	0.276599	0.0912838	0.100748	0.239963	0.0265608	0.128835	-0.276599	-0.0399939	0.0683865	0.184399	0.326057	-0.226225	0.475958	0.25187	-0.0922137	0.370324	-0.0372179	-0.106243	-0.345901	-0.092505	0.0454962	0.386764	-0.0155701	0.0662494	0.185734	-0.0891467
LH	-0.10536	-0.0772637	0.374103	-0.357001	0.0781799	0.10139	-0.170713	-0.0137426	0.0244312	-0.265384	-0.135593	-0.205222	0.23118	0.185372	0.175294	0.0155749	-0.0122156	-0.0119102	0.129791	0.0363414	0.213468	0.0913117	0.266606	0.128264	0.0427546	-0.0760422	0.2663	0.0742098	-0.0506948	-0.162773	-0.0983356	-0.0216827	0.178348	0.24248	-0.183845	0.329821	0.124905	-0.0120648	0.211854	0.00771418	-0.0143533	-0.217438	-0.113911	-0.0933109	0.243175	-0.0845931	0.247977	0.111536	-0.0888685
PRL	0.140415	-0.161783	-0.00549451	0.0103785	-0.111111	-0.152015	-0.0775336	0.271062	-0.025641	0.028083	0.0018315	-0.0726496	0.137363	0.0250305	-0.035409	0.0152625	-0.015873	-0.000610501	0.0103785	0.0518926	0.316239	0.01221	-0.0323565	-0.226496	0.0903541	-0.150794	0.241758	0.101343	-0.177656	0.0677656	-0.272283	-0.0634921	0.105617	0.0952381	0.209402	-0.0702076	0.0152625	0.203938	-0.140251	-0.0248082	0.0781441	0.195971	0.0213675	-0.342543	-0.0432937	0.0659341	0.174603	-0.0537569	-0.0347985
T	-0.122724	-0.0192809	0.438257	-0.374906	0.0183627	0.109564	0.0633514	-0.0293804	0.13466	-0.225555	-0.16098	-0.0762053	0.28401	0.0535579	0.262893	0.19036	0.203826	0.0128539	0.126397	0.060903	-0.138333	0.00428464	0.280338	0.203826	-0.067636	0.0174446	-0.0835504	0.0612091	-0.074369	-0.232288	-0.0557003	0.145372	0.113237	0.0847746	-0.201072	0.348586	0.0385617	0.117692	0.311694	-0.100836	-0.0985466	-0.10834	0.121194	0.144935	0.373916	0.107728	-0.139251	0.233962	0.0679421
[truncated: 29 more columns]
